# Supplementary material for: Vasopressin in Hemorrhagic Shock: A Systematic Review and Meta-Analysis of Randomized Animal Trials
Source: Hindawi journal article supplement (doi:10.1155/2014/421291), 2014-01-01
Supplement: f1 [file 421291.f1.zip]

# Vasopressin in hemorrhagic shock: a systematic review and meta-analysis of randomized animal trials.

Cossu AP<sup>1</sup>, Mura P<sup>1</sup>, De Giudici LM<sup>1</sup>, Pasin L<sup>2</sup>, Evangelista M<sup>3</sup>, Musu M<sup>1</sup>, Finco G<sup>1</sup>.

<sup>1</sup> UOC Anesthesia and Intensive Care and, Pain Therapy Service, AOU Cagliari

Department of Medical Sciences "M. Aresu", University of Cagliari, Italy.

<sup>2</sup> Department of Anesthesia and Intensive Care, Vita-Salute San Raffaele University, Milan, Italy.

<sup>3</sup> Department of Anesthesia and Intensive Care, Catholic University, Rome, Italy

Corresponding Author: Cossu Andrea Pasquale. [andreapcossu@yahoo.it](mailto:andreapcossu@yahoo.it)

Keywords: vasopressin, terlipressin, haemorrhagic shock, hypovolemic shock, vasopressors.

## Supplemental Material

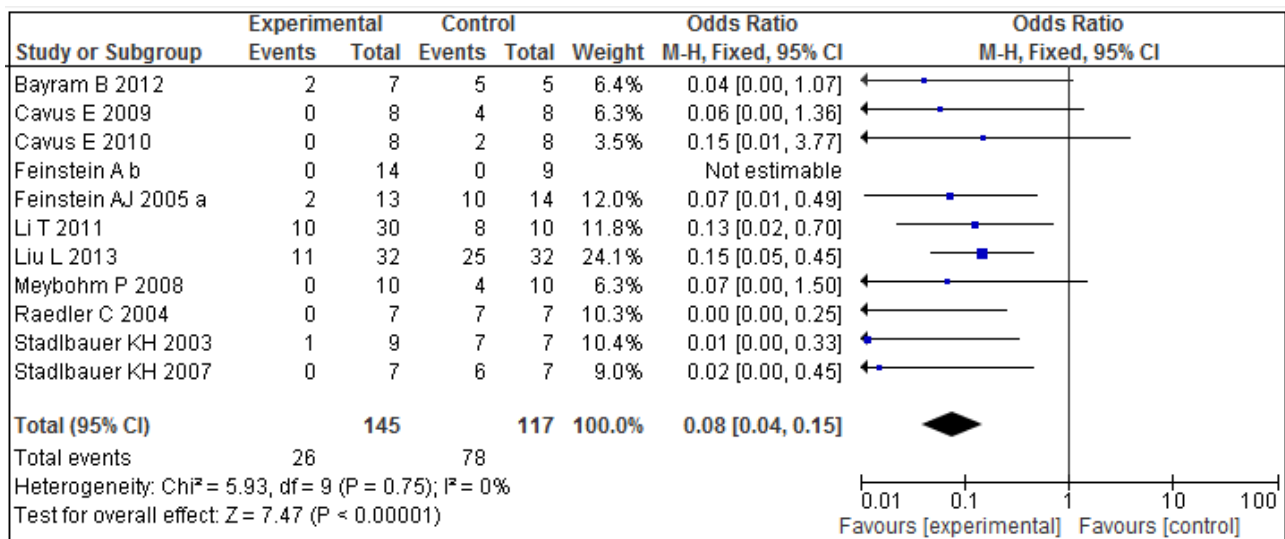

Fig 6a: AVP or terlipressin vs fluid resuscitation

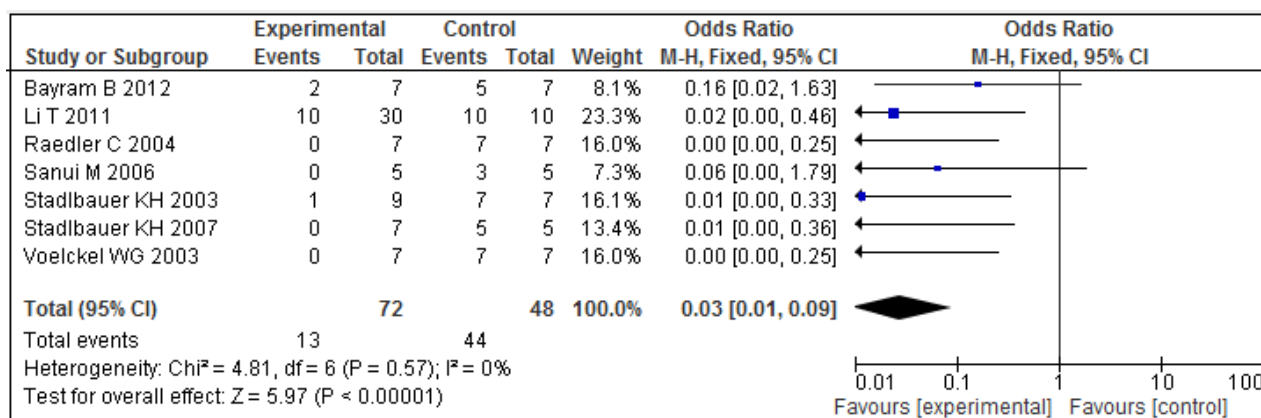

Fig 6b: AVP or terlipressin vs placebo

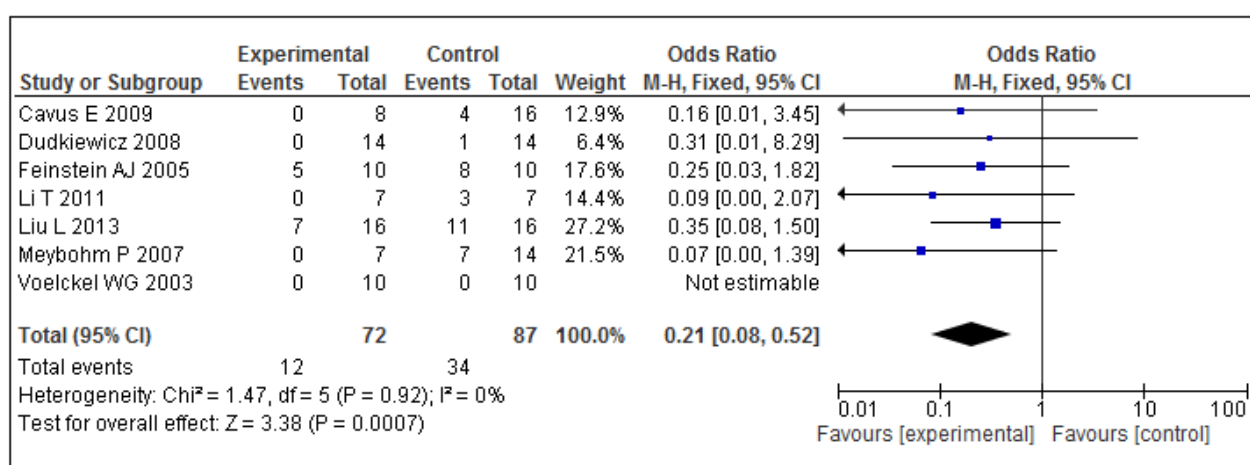

Fig 6c: AVP vs other vasoconstrictive drugs

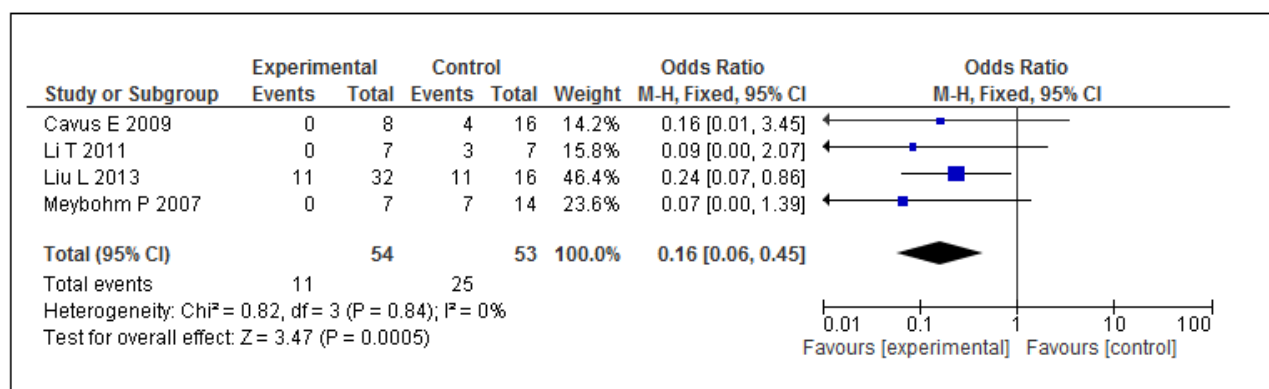

Fig 6d: AVP vs NE

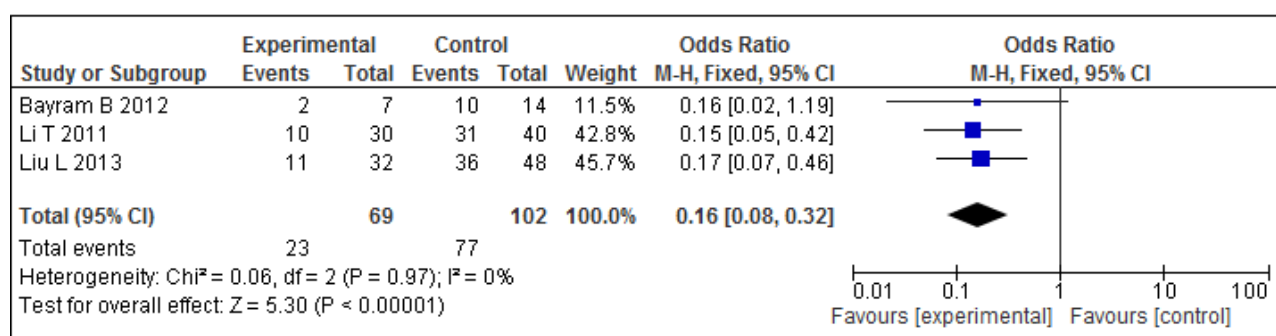

Fig. 7a: AVP or terlipressin vs all other strategies in rats

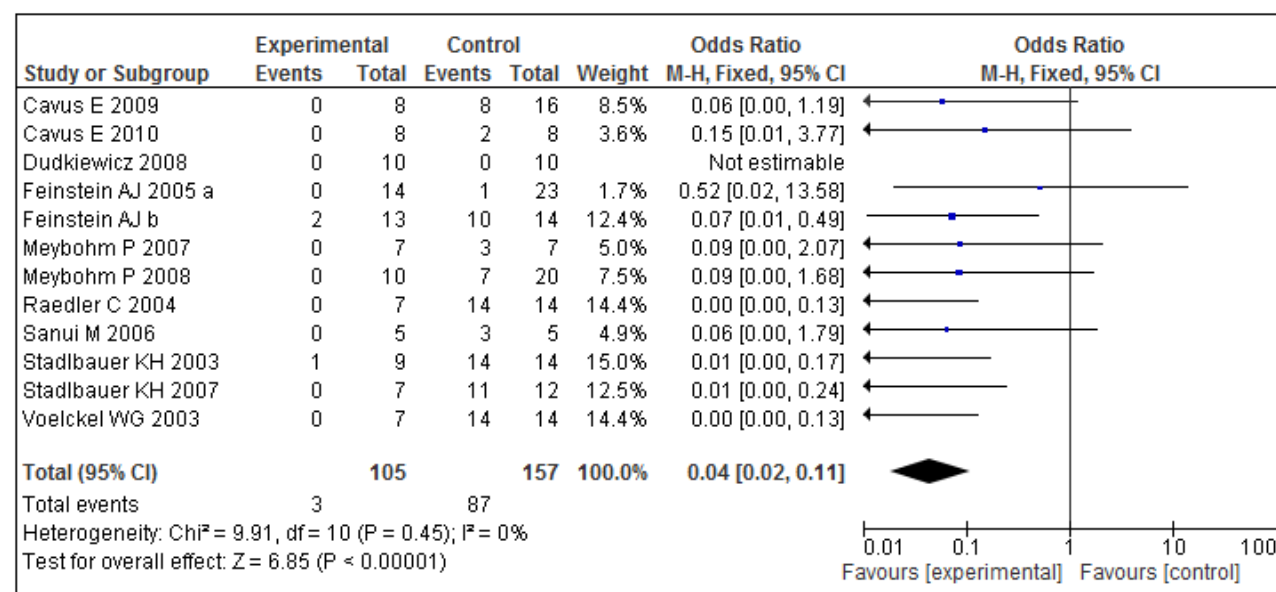

Fig. 7b: AVP vs all other strategies in pigs.

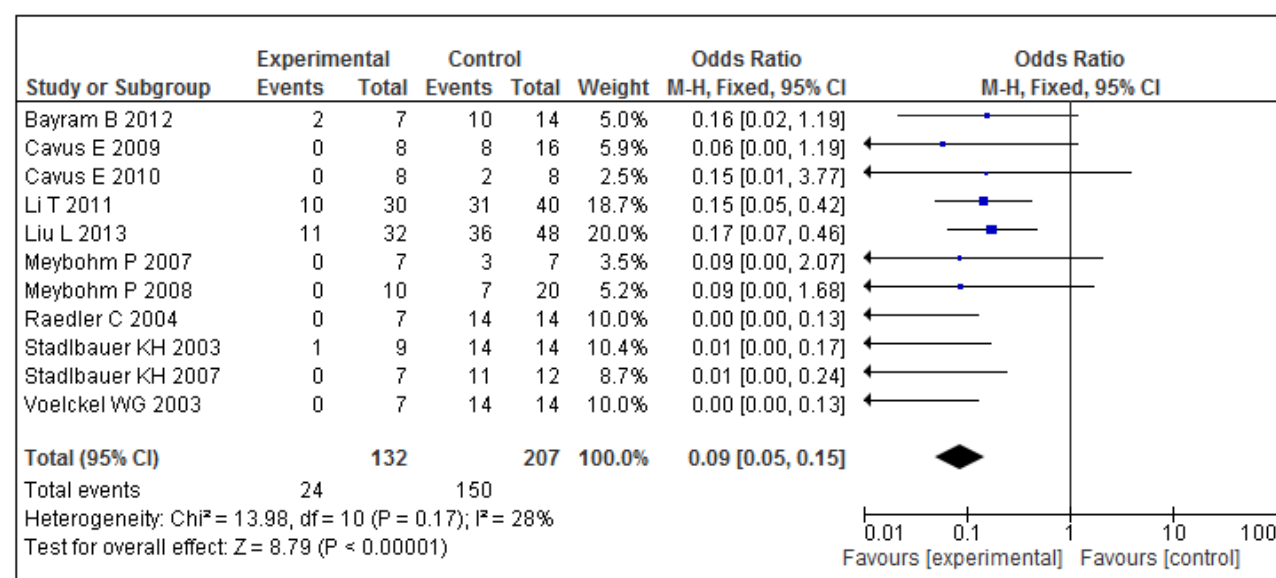

Fig. 8: Meta-analysis performed considering only studies where hemorrhagic shock was due to bleeding occurring in the splanchnic area.

|  |  |  |  |  |  |  |
|--|--|--|--|--|--|--|
|  |  |  |  |  |  |  |
|--|--|--|--|--|--|--|

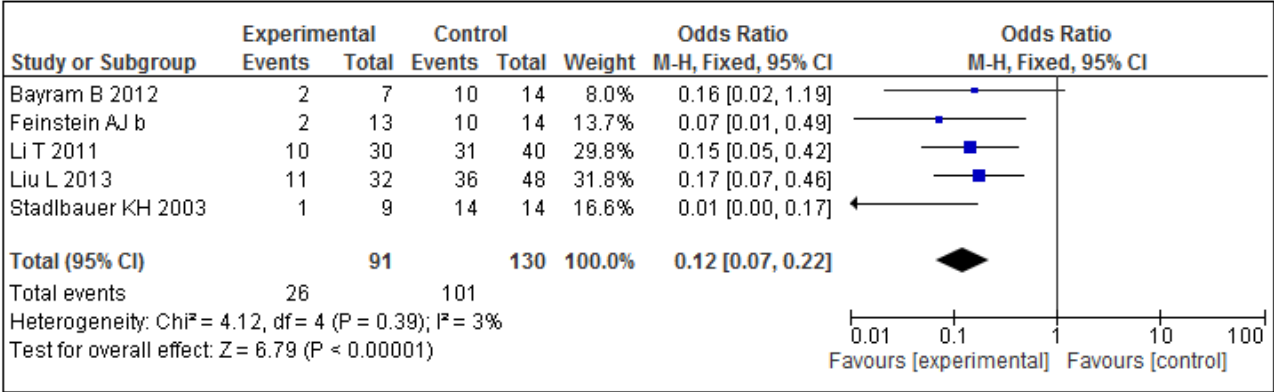

Fig. 9: meta-analysis performed excluding studies with zero mortality rate.

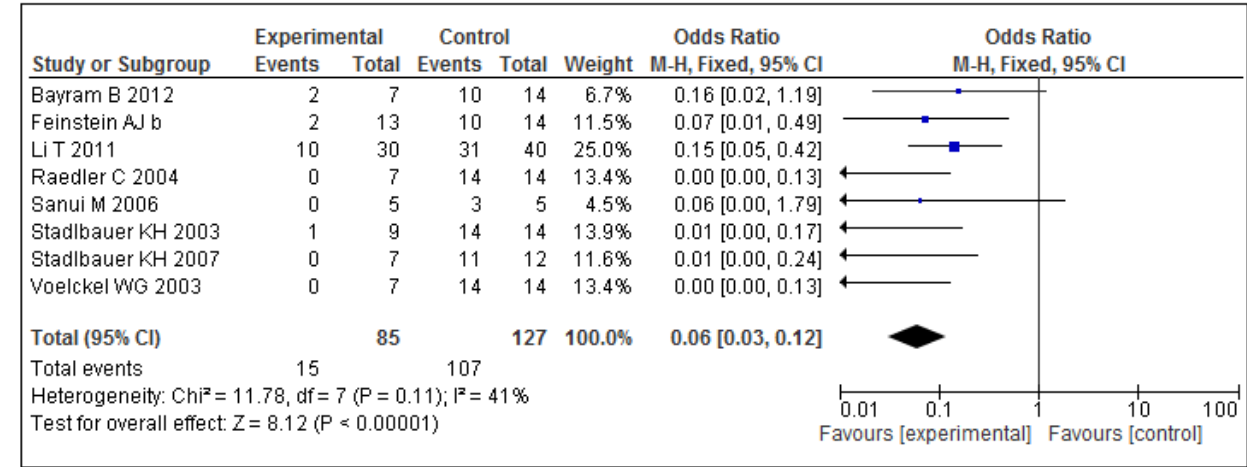

Fig. 10:meta-analysis performed considering only studies that used mortality as the primary endpoint

| Trial                | AVP or<br>terlipressin<br><br>dosages                                           | Fluid<br>administratio<br>n in AVP<br>group                                         | Vasopressors<br><br>dosages<br><br>In control<br>groups                 | Fluid<br>administration<br>in vasopressor<br>groups                      | Fluid<br>administration in<br>fluid<br>resuscitation<br>groups              | AVP +<br>VASOPRES<br>SORS |
|----------------------|---------------------------------------------------------------------------------|-------------------------------------------------------------------------------------|-------------------------------------------------------------------------|--------------------------------------------------------------------------|-----------------------------------------------------------------------------|---------------------------|
| Bayram B [3]         | Terlipressin:<br><br>50 µg/kg                                                   | LR 2 mL/kg<br><br>per min<br><br>(PAM target<br>40 mmHg)                            | -                                                                       | -                                                                        | Bolus of LR (4<br><br>mL/kg) + 2<br><br>mL/kg/min (PAM<br>target 40 mmHg)   | NO                        |
| Cavus E [31]         | AVP: bolus<br>of 0.2U/kg<br><br>+ infusion<br><br>2U/kg/h                       | HSS 4mL/kg<br><br>over 2min                                                         | -                                                                       | -                                                                        | LR (40mL/kg)<br><br>+HES 130/0.4<br><br>(20mL/kg) over<br><br>30min         | NO                        |
| Cavus E [55]         | AVP: bolus<br>0.2U/kg +<br><br>infusion<br><br>0.04U/kg/m<br><br>in             | HSS (4mL/kg)<br><br>over 2min                                                       | NE (bolus 20<br><br>γg/kg + 1<br><br>γg/kg/min<br>infusion)             | HSS (4mL/kg)<br><br>over 2min                                            | 6% HES 130/0.4<br><br>(20 mL/kg) + LR<br><br>(40 mL/kg) over<br><br>30 min; | NO                        |
| Dudkiewicz M<br>[56] | AVP titrated<br>to maintain<br>a CPP > 70<br>mm Hg and<br><br>CVP > 12<br>mm Hg | NS 1 L +<br><br>unlimited NS<br>to SAP>100<br><br>plus 250<br>mg/kg<br><br>mannitol | NE titrated to<br>maintain a CPP<br>> 70 mm Hg<br>and CVP > 12<br>mm Hg | NS 1 L +<br><br>unlimited NS to<br>SAP>100 plus<br>250 mg/kg<br>mannitol | -                                                                           | NO                        |
| Feinstein AJ         | AVP: 0.1<br><br>U/kg                                                            | NS titrated to<br><br>MAP > 60                                                      | PE: 0.05 mg/kg<br><br>+ bolus to MAP                                    | NS titrated to<br><br>MAP > 60                                           | NS titrated to                                                              | NO                        |

|                              |                                                        |                                                           |            |                                               |                                                                                |                                                                                                  |
|------------------------------|--------------------------------------------------------|-----------------------------------------------------------|------------|-----------------------------------------------|--------------------------------------------------------------------------------|--------------------------------------------------------------------------------------------------|
| <b>[8]</b>                   | + bolus to<br>MAP > 60<br>mmHg                         | mmHg (only 1<br>group)                                    | > 60 mmHg  | mmHg (only 1<br>group)                        | MAP > 60 mmHg                                                                  |                                                                                                  |
| <b>Feinstein AJ<br/>[32]</b> | AVP 0.1<br>U/kg +<br>continuous<br>AVP<br>(0.4U/kg/hr) | NS bolus 10<br>mL/kg + NS<br>was infused to<br>MAP>70mmHg | -          | -                                             | NS bolus 10<br>mL/kg + NS was<br>infused to MAP ><br>70 mmHg                   | NO                                                                                               |
| <b>Li T [11]</b>             | AVP 0.1<br>U/kg                                        | Two volume of<br>LR                                       | NE 1 mg/kg | Two volumes of<br>LR                          | Two volumes of<br>LR solution; One<br>volume of blood<br>+ one volume of<br>LR | AVP 0.1<br>U/kg + NE<br>1 mg/kg +<br>LR 2<br>volumes or<br>blood 1<br>volume +<br>LR 1<br>volume |
| <b>Liu L [39]</b>            | AVP 0.04 or<br>0.4 U/kg                                | LR (17.5 mL/kg<br>or 8.75mL/kg<br>or 1 mL/kg)             | NE 3 µg/kg | LR (17.5 mL/kg<br>or 8.75mL/kg or<br>1 mL/kg) | LR (17.5 mL/kg or<br>8.75mL/kg or 1<br>mL/kg)                                  | AVP 0.04<br>or 0.4 U/kg<br>+ NE 3<br>µg/kg + LR<br>(17.5<br>mL/kg or<br>8.75mL/kg<br>or 1 mL/kg) |

|                           |                                              |                                                                                     |                                            |                                 |                                                                                                       |    |
|---------------------------|----------------------------------------------|-------------------------------------------------------------------------------------|--------------------------------------------|---------------------------------|-------------------------------------------------------------------------------------------------------|----|
| <b>Meybohm P [13]</b>     | AVP bolus<br>10 U +<br>2 U/kg/hr             | HHS 4 mL/kg<br>during 2<br>minutes                                                  | NE 1000 µg +<br>infusion of 60<br>µg/kg/hr | HHS 4 mL/kg<br>during 2 minutes | -                                                                                                     | NO |
| <b>Meybohm P [57]</b>     | AVP bolus<br>0.2Ukg + 2<br>UI/kg/h           | HHS (4 mL/kg<br>over 2min) +<br>LR 10 ml/kg/h<br>and HES 10<br>ml/kg H              | -                                          | -                               | LR (40 mL/kg)<br>and HES 130/0.4<br>(20mLkg) + LR 10<br>ml/kg/h and HES<br>10 ml/kg H                 | NO |
| <b>Raedler C [10]</b>     | AVP 0.4<br>U/kg bolus +<br>0.04<br>ml/kg/min | HES 1000 mL<br>and<br>LR 1000 mL<br>(after 30 min)                                  | -                                          | -                               | LR 1000 MI + HES<br>1000 mL (up to 8<br>ml/kg/min) + HES<br>1000 mL and<br>LR 1000 mL after<br>30 min | NO |
| <b>Sanui M [21]</b>       | AVP 0.2<br>U/kg bolus +<br>0.1<br>U/kg/min   | NS 10 mL/kg +<br>crystalloids<br>MAP target ><br>60 mm Hg                           | -                                          | -                               | NS 10 mL/kg +<br>crystalloids MAP<br>target > 60 mm<br>Hg                                             | NO |
| <b>Stadlbauer KH [30]</b> | AVP 0.4<br>U/kg + 0.08<br>U/kg/min           | Whole blood<br>(~40 ml/kg) LR<br>25 ml/kg and<br>25 ml/kg 3%<br>gelatin<br>solution | -                                          | -                               | LR 25 ml/kg and<br>25 ml/kg 3%<br>gelatin solution                                                    | NO |
|                           |                                              |                                                                                     |                                            |                                 |                                                                                                       |    |

|                                         |                     |                                                                       |              |           |             |    |
|-----------------------------------------|---------------------|-----------------------------------------------------------------------|--------------|-----------|-------------|----|
| <b>Stadlbauer KH</b><br><br><b>[40]</b> | AVP 0.4<br><br>U/kg | LR 25 mL/kg +<br><br>25 mL/kg 3%<br><br>gelatin (after<br><br>30 min) | -            | .         | LR 25 mL/kg | NO |
| <b>Voelckel WG</b><br><br><b>[1]</b>    | AVP 0.8<br><br>U/kg | 3 mL/kg/h                                                             | PE 200 µg/kg | 3 mL/kg/h | -           | NO |

**Tab. 3: dosages of AVP/terlipressin, vasopressors and fluid resuscitation in studies included in meta-analysis.**  
**LR: Lactate Ringer; HES: hydroxyethylstarch; HSS: hypertonic-saline-starch solution; CPP: cerebral perfusion pressure; CVP: central venous pressure; PE: phenylephrine; NS, normal saline; HHS: HyperHAES**



| STUDY<br>(First Author and Year of publication) | PRIMARY ENDPOINT OF THE STUDY                                                                | SETTING                                                            |
|-------------------------------------------------|----------------------------------------------------------------------------------------------|--------------------------------------------------------------------|
| <b>Bayram B. 2012</b>                           | Increase in MAP<br>Survival rates                                                            | Liver Trauma                                                       |
| <b>Cavus E 2010</b>                             | Changes of bis-pectral index (BIS)<br>Changes of cerebral perfusion                          | Liver Trauma                                                       |
| <b>Cavus E 2009</b>                             | Haemodynamic and cerebral variables                                                          | Liver Trauma                                                       |
| <b>Dudkiewicz M 2008</b>                        | Maintain tissue oxygenation during cerebral perfusion pressure management                    | Blunt trauma to the head and bilateral chests                      |
| <b>Feinstein AJ 2005</b>                        | ICP<br>Physiologic resuscitation parameters                                                  | Percussion traumatic brain Injury followed by hemorrhage           |
| <b>Feinstein AJ 2005</b>                        | Mortality<br>Fluid requirement<br>Pulmonary function                                         | Severe chest trauma                                                |
| <b>Li T 2011</b>                                | 12-h animal survival rate<br>Tissue blood flow<br>Mitochondrial function of liver and kidney | Splenic parenchyma and one of splenic artery transection           |
| <b>Liu L 2013</b>                               | Maintain and stabilize hemodynamic parameters                                                | Transection of the splenic parenchyma, the splenic artery and vein |
| <b>Meybohm P 2007</b>                           | Cerebral perfusion pressure (CPP) and brain metabolism                                       | Liver bleeding                                                     |
| <b>Meybohm P 2008</b>                           | Cerebral perfusion pressure (CPP) and protein S100B                                          | Liver trauma                                                       |
| <b>Raedler C 2004</b>                           | Hemodynamic variables<br>Short-term survival                                                 | Liver trauma                                                       |
| <b>Sanui M 2006</b>                             | Intracranial pressure (ICP)<br>Survival                                                      | Traumatic brain injury                                             |

|                           |                                                                     |                           |
|---------------------------|---------------------------------------------------------------------|---------------------------|
| <b>Stadlbauer KH 2003</b> | Hemodynamic variables<br>Survival                                   | Liver trauma              |
| <b>Stadlbauer KH 2007</b> | Hemodynamic variables<br>Survival                                   | Abdominal vascular injury |
| <b>Voelckel WG 2003</b>   | Hemodynamic variables<br>Regional blood flow<br>Short-term survival | Liver trauma              |

**Tab. 4: Primary endpoint of animal studies**
